# Supplementary material
Source: Elsevier journal article supplement (https://www.sciencedirect.com/science/article/pii/S1134009618301979)
Supplement: mmc1 [file S1134009618301979:mmc1.docx]

**ANEXO 1**

**RELACIÓN DE APARATOS Y SISTEMAS NECESARIOS EN UN QUIRÓFANO DE CIRUGÍA CARDIOVASCULAR**

- Un mínimo de ocho paneles eléctricos de cuatro enchufes, el mayor número de ellos colocados en las torres de quirófano para evitar la presencia de cables en áreas de tránsito.

- Electricidad conectada a sistemas de alimentación ininterrumpida (SAI) y a un grupo electrógeno.

- Tomas de agua caliente y fría, de oxígeno, de aire y de vacío.

- Dos juegos completos de instrumental específico de cirugía cardiovascular que contemplen las distintas patologías y técnicas.

- Consola de CEC de cinco módulos con accesorios completos y anejos de mantenimiento.

- Al menos tres módulos de bomba centrífuga.

- Intercambiador de calor autónomo.

- Un mínimo de seis bombas de infusión de fármacos.

- Un mínimo de tres transductores de presión.

- Aparato de determinación de gases, hemoglobina e iones.

- Sistemas de control del tiempo de coagulación y heparinemia, tromboelastograma.

- Monitor central y al menos un terminal satélite con:

• Tres canales de presión.

• Dos canales de electrocardiografía.

• Módulo de gasto cardíaco.

• Saturación arterial de oxígeno

- Monitor que valore el nivel de profundidad anestésica con el índice biespectral (BIS).

- Monitor que mida el nivel de saturación cerebral de oxígeno con infrarrojos (NIRS).

- Respirador, tubuladuras y accesorios para proporcionar adecuada asistencia respiratoria al paciente.

- Torre de aporte de gases anestésicos.

- Un sistema de fibrobroncoscopia para intubaciones difíciles.

- Polígrafo y grabador.

- Fuente de luz fría frontal.

- Desfibrilador externo e interno con potencia regulable entre 5-400 J, palas apropiadas.

- Al menos tres sierras de esternón de pilas recargables.

- Bisturí de ultrasonidos.

- Sistemas de calefacción de sangre y sueros.

- Ecocardiógrafo con sonda transesofágica.

- Ecógrafo de partes blandas para asistencia en las canalizaciones vasculares.

- Sistema de recuperación y autotransfusión de sangre.

- Al menos tres marcapasos externos unicamerales y tres bicamerales.

- Sistema de ablación y mapeo de arritmias.

- Al menos un balón intraaórtico de contrapulsación con su correspondiente consola y el equipamiento adecuado, siendo de disposición inmediata.

- Consola de asistencia circulatoria (uni o biventricular).

- Torre de videotoracoscopia

- Sistema de radiología para técnicas transcatéter y endovasculares, así como para las técnicas de electroestimulación.

- Amplificador de imágenes.

- Neveras de conservación de fármacos y soluciones.

- Mesa de quirófano con posición y altura regulables. Mesas de Mayo para el instrumental quirúrgico y de anestesia.

- Al menos dos sistemas de aspiración para el campo quirúrgico.

- Lámparas de quirófano, disposición de al menos dos para el campo quirúrgico. Sistema de iluminación sectorizado en el quirófano y regulable en intensidad. Cámara de grabación en video integrada en la luz principal del campo quirúrgico.

**ANEXO 2**

**RECURSOS ESTRUCTURALES, SISTEMAS Y APARATOS NECESARIOS EN LA UNIDAD DE CUIDADOS POSTOPERATORIOS DE CIRUGÍA CARDIOVASCULAR**

Todos los sistemas descritos más adelante deben cumplir con las normativas de prevención de riesgos laborales.

**Necesidades básicas generales**

– Sistema de analítica básica con determinación de gases, glucemia, electrolitos, hematocrito y calcio.

– Sistema de control de la heparinemia y del tiempo de coagulación activado, tromboelastograma.

– Al menos tres sistemas de calefacción de pacientes con mantas de aire desechables.

– Al menos cuatro bombas de alimentación enteral.

– Al menos cuatro generadores de marcapasos bicamerales externos.

– Al menos dos sistemas de registro de ECG de 12 canales.

– Un carro de parada totalmente equipado.

– Un carro de material de esternotomía totalmente equipado.

– Un ecocardiógrafo y sonda de procedimiento transesofágico.

– Un sistema de fibrobroncoscopia para intubaciones difíciles.

– Al menos tres consolas de contrapulsación aórtica y accesorios.

- Consola de asistencia circulatoria (uni o biventricular) de corta y larga duración, si procede.

– Una grúa de movilización de pacientes con dos arneses.

– Varias terminales de estación clínica de trabajo en conexión con la red del centro.

- Al menos dos dispositivos para poder llevar a cabo medidas de depuración extrarenal

**Cubículo** *(box)* **de cuidados intensivos**

– Un mínimo de ocho cubículos de cuidados intensivos y seis de cuidados intermedios plenamente dotados.

– Un mínimo de 20 m2 de superficie útil. Al menos un cubículo debe tener un tamaño de 30 m2 para atender pacientes de alta complejidad tratados con tecnologías de grandes dimensiones. Al menos dos de ellos deben tener capacidad para aislamiento medioambiental y humano.

– Aislamiento eléctrico adecuado.

– Iluminación directa e indirecta regulable.

– Lámpara cenital o portátil para realizar procedimientos quirúrgicos.

– Tomas de agua para diálisis.

– Tomas de aire comprimido, oxígeno, vacío.

– Barra técnica completa con accesorios.

– Electricidad conectada a sistemas de alimentación ininterrumpida (SAI) y a un grupo electrógeno.

– Ventilador volumétrico de última generación.

– Torre de aporte de gases anestésicos.

– Monitor multicanal con al menos cinco módulos y capacidad de monitorización de al menos dos presiones, uno de gasto cardíaco y otro de saturación de oxígeno. Conexión a la estación de enfermería.

– Al menos seis bombas de inyección de fármacos en cubículo de UCI y dos en cubículo de cuidados intermedios.

– Sistema de vacío eléctrico.

– Una cama articulada multifunción eléctrica y móvil con colchón antiescara.

– Sillón anatómico para la movilización del paciente y mesa de Mayo.

– Lavamanos para procedimientos con accesorios.

– Silla de escritorio con mesa de escritorio para enfermería.

– Terminal informática de datos clínicos del paciente.

– Recipientes de recogida de basuras selectivas.

– Recipiente de recogida de productos de riesgo.

**Estación de control de enfermería**

–  Área de al menos 40 m2 localizada en el punto de mejor acceso a todos los pacientes, de fácil entrada y salida, con buena visibilidad del área de la unidad y con el espacio central libre de obstáculos para facilitar el tráfico continuo de personal.

–  Mesa amplia de trabajo con al menos tres terminales de estación clínica, una de las cuales debe disponer de una pantalla amplia para la visualización de estudios de imagen.

–  Central de monitorización cardiológica de altas prestaciones para control de todos los pacientes ingresados en la unidad.

–  Armarios de almacenaje de material fungible y no fungible.

–  Nevera de medicamentos.

–  Zona de lavamanos con accesorios.

- **Otras áreas de la unidad**.

– Despacho del responsable médico.

– Despacho del responsable de enfermería.

– Cuarto y despacho de trabajo del médico de guardia de la unidad.

– Área de secretaría de la unidad.

– Almacén general de al menos 60 m2.

– Almacén de lencería de 15 m2.

– Baño completo, amplio y sin barreras físicas, con asas de apoyo, con sillón de lavado y sistema de alarma.

– Zona de estar para personal de 15 m2 con área de cocina y zona de descanso.

– Vestuarios masculino y femenino con armarios individuales y baño.

– Sala de espera de familiares de al menos 30 m2.

– Despacho de comunicación con familiares, contiguo a la sala de espera.

**ANEXO 3**

**NECESIDADES ESPECÍFICAS DE LA SALA DE HOSPITALIZACIÓN**

**Generales**

– Un sistema de registro de ECG de 12 canales.

– Dos marcapasos bicamerales externos.

- Al menos cuatro marcapasos unicamerales externos

– Un ecógrafo-Doppler vascular.

– Un monitor portátil de al menos tres módulos.

– Al menos seis bombas de infusión de medicación.

– Al menos tres bombas de alimentación enteral.

– Una grúa con dos arneses para movilización de pacientes.

– Una caja de toracotomía.

– Un sistema de luz apropiado para procedimientos.

– Una sala de curas con utillaje quirúrgico básico.

– Un carro de parada totalmente utillado.

– Protocolos escritos específicos de cuidados pre y postoperatorios.

– Protocolos de actuación en situación de urgencia y emergencia.

– Sistema de telemetría ECG y/o presión arterial.

**Cama de hospitalización**

– Barra técnica completa con accesorios.

– Toma de aire comprimido, oxígeno y vacío.

– Sistema de aspiración central regulable.

– Una caja de toracotomía.

– Dos cajas de curas de herida.

– Cama articulada eléctrica y móvil con salida fácil de la habitación.

– Lavabo en la habitación con ducha diseñado para personas con limitaciones físicas.

– Conexiones eléctricas para aparatos de alta potencia.

– Sillón o cama para un familiar o acompañante

**ANEXO 4**

**COMPETENCIAS POR ADQUIRIR DURANTE EL PERÍODO DE RESIDENCIA EN CIRUGIA CARDIOVASCULAR.**

**Competencias Esenciales**

- - Compromiso con los principios y valores de las especialidades en Ciencias de la Salud.
  - Principios de Bioética.
  - Principios legales aplicables al ejercicio de las especialidades en Ciencias de la Salud.
  - Comunicación Clínica.
  - Trabajo en Equipo
  - Habilidades clínicas generales.
  - Manejo de fármacos y otros recursos terapéuticos.
  - Determinantes de salud y enfermedad, prevención y promoción de la Salud.
  - Manejo de la información en ciencias de la Salud.
  - Investigación.
  - Docencia y formación.
  - Gestión clínica y de la calidad.

**Competencias por adquirir en el primer periodo de formación.**

- Organización del área quirúrgica.
- Seguridad del paciente, higiene y gestión de riesgos.
- Técnicas y procedimientos en cirugía.
- Formación en áreas específicas quirúrgicas.
- Habilidades y procedimientos técnicos de urgencias.

**Competencias específicas durante el segundo periodo de formación.**

- - Cuidado específico del paciente cardiovascular. Manejo perioperatorio.
  - Cuidados críticos y manejo postoperatorio.
  - Circulación extracorpórea y protección miocárdica.
  - Enfermedad isquémica cardiaca. Bypass aortocoronario.
  - Cirugia complicaciones mecánicas del infarto de miocardio.
  - Enfermedad valvular. Cirugía valvular abierta.
  - Cirugia endovascular de las válvulas (TAVI, y otros sistemas percutáneos)
  - Cirugía de la aorta torácica, toracoabdominal y sus ramas. Tratamiento endovascular.
  - Cirugía de las arritmias. Implantación marcapasos, DAI y TRC
  - Patología del pericardio.
  - Cirugía de la insuficiencia cardiaca, asistencia ventricular y trasplante.
  - Patología del sistema vascular periférico.
  - Cirugía percutánea, miniinvasiva y robótica.
  - Cirugía de las cardiopatías congénitas.
  - Traumatismos y tumores cardiovasculares.
  - Cirugía de la hipertensión arterial pulmonar y tromboembolismo pulmonar.
  - Cirugía experimental y simulación.

**ANEXO 5**

**PROGRAMA DOCENTE DE RESIDENCIA EN CIRUGÍA CARDIOVASCULAR.**

El programa vigente actual data del año 1996 y puede consultarse en el siguiente enlace del Ministerio de Sanidad, Consumo y Bienestar Social 56. No obstante, transcribimos las competencias definidas en el nuevo programa de formación propuesto por la Comisión Nacional de la Especialidad de Cirugía Cardiovascular, consensuado con la SECTCV y aprobado por el Pleno del Consejo Nacional de Especialidades en Ciencias de la Salud en julio de 2015 y pendiente de ser aprobado por la Dirección General de Recursos Humanos del Ministerio de Sanidad, Consumo y Bienestar Social para su publicación en el BOE.

**--------------------------------------------------------------------------------------------------------------------------------------**

**A) COMPETENCIAS ESENCIALES. (A ADQUIRIR DURANTE TODO EL PERIODO DE RESIDENCIA).**

**1. COMPROMISO CON LOS PRINCIPIOS Y VALORES DE LAS ESPECIALIDADES EN CIENCIAS DE LA SALUD**

-Tener como principal objetivo el cuidado y el bienestar del paciente

-Respetar los valores y los derechos de los pacientes, teniendo en cuenta su diversidad y vulnerabilidad

-Respetar la autonomía de los pacientes y de sus representantes legales en la toma de decisiones

-Respetar la confidencialidad y el secreto profesional

-Colaborar, consultar y pedir ayuda a otros profesionales.

-Adquirir y las competencias profesionales de la especialidad

-Contribuir al cumplimiento de los principios del Sistema Nacional de Salud establecidos en los art. 3 y 4 de la Ley 14/1986, de 25 de abril, General de Sanidad

**2. PRINCIPIOS DE BIOÉTICA**

-Aplicar los fundamentos de la bioética y el “método de deliberación” en la práctica profesional

-Identificar y afrontar situaciones de conflicto ético

**3. PRINCIPIOS LEGALES APLICABLES AL EJERCICIO DE LAS ESPECIALIDADES EN CIENCIAS DE LA SALUD.**

-Conocer los aspectos éticos y legales relacionados con el manejo de la información, la documentación y la historia clínica para garantizar la confidencialidad y el secreto profesional.

-Conocer los aspectos legales relacionados con la atención sanitaria de menores, incapacitados, pacientes con capacidad de tomar decisiones reducida, al final de la vida y con la adecuación del esfuerzo terapéutico.

-Conocer el funcionamiento de las comisiones clínicas.

-Cumplimentar documentos clínico-legales.

-Detectar precozmente y aplicar los protocolos establecidos en situaciones de violencia de género y de abuso-maltrato.

-Informar y aplicar los procedimientos de voluntades anticipadas

**4. COMUNICACIÓN CLÍNICA**

-Informar al paciente para que otorgue el consentimiento libre y voluntario, dejando constancia en la historia clínica. Comunicar de acuerdo con diferentes situaciones y personas

-Detectar las necesidades de información de cada paciente, responsable legal o persona autorizada expresamente por el paciente.

-Adecuar la información en situaciones concretas como: i) las malas noticias, ii) pacientes al final de la vida, iii) pacientes de manejo difícil, iv) pacientes con trastorno mental, v) grupos específicos de población (niños, adolescentes, ancianos, personas en riesgo de exclusión y discapacitados)

-Aplicar estrategias para la mejora de la adherencia al tratamiento prescrito y favorecer la toma de decisiones compartidas

**5. TRABAJO EN EQUIPO**

-Trabajar en equipos interdisciplinares y multi-profesionales

-Contribuir a la resolución de conflictos

**6. HABILIDADES CLÍNICAS GENERALES**

-Contribuir a la elaboración de la historia clínica de forma comprensible y utilizable por terceros.

-Analizar críticamente la información clínica.

-Identificar situaciones urgentes y aplicar las maniobras de soporte vital básico

-Aplicar criterios de derivación e interconsulta.

-Valorar el impacto asociado a la enfermedad en el paciente y su entorno.

-Abordar de forma integral los problemas de salud crónicos contribuyendo a la toma de decisiones y la optimización de cuidados.

-Atender de forma integral a los pacientes con trastorno mental, ancianos, dependientes y pluri-patológicos.

**7. MANEJO DE FÁRMACOS Y OTROS RECURSOS TERAPEUTICOS**

-Aplicar principios éticos y requisitos legales en la prescripción de fármacos y otros recursos terapéuticos.

-Usar de forma razonada los medicamentos y otros recursos terapéuticos teniendo en cuenta necesidades individuales de cada paciente y a los grupos de pacientes que requieren un manejo específico.

-Conocer los principios del uso racional de antimicrobianos. ~~.~~

-Revisar periódicamente la medicación y los objetivos terapéuticos para realizar los ajustes pertinentes y evitar iatrogenia.

-Detectar y notificar las reacciones adversas a fármacos y otros agentes.

**8. DETERMINANTES DE SALUD Y ENFERMEDAD PREVENCION Y PROMOCIÓN DE LA SALUD**

- Aplicar los principios de la epidemiologia y la genómica (cuando proceda y esté disponible) para la toma de decisiones para la salud.

-Realizar educación para la salud, promoción y prevención de la enfermedad.

- Aplicar los principios legales de protección radiológica en las prácticas diagnósticas y terapéuticas para profesionales y pacientes.

-Conocer los derechos y aplicar las medidas preventivas y de protección de riesgos laborales específicas del ejercicio de la especialidad.

-Notificar las enfermedades de declaración obligatoria y comunicar las sospechas de enfermedad profesional.

**9. MANEJO DE LA INFORMACIÓN EN CIENCIAS DE LA SALUD**

-Utilizar las fuentes contrastadas de información biomédica o en ciencias de la salud

-Aplicar los principios básicos de la práctica basada en la evidencia y en el valor para el paciente.

-Utilizar las tecnologías de la información y la comunicación en el desempeño profesional.

-Garantizar la protección de datos y la confidencialidad del paciente en la utilización de la información sanitaria.

-Conocer las bases de los sistemas de codificación

**10. INVESTIGACIÓN**

-Conocer la normativa ética y legal y los requisitos reguladores españoles para realizar investigación en seres humanos.

-Conocer los principios básicos de la investigación biomédica: básica, traslacional, clínica y epidemiológica.

-Generar conocimiento científico aplicando el método científico y los principios de la bioética.

-Observar la perspectiva de género y edad en la generación e interpretación de la evidencia científica.

-Difundir el conocimiento científico.

-Interpretar críticamente la literatura científica.

**11. DOCENCIA Y FORMACIÓN**

-Planificar, diseñar y participar en actividades formativas (sesiones clínicas, talleres).

-Usar la lengua inglesa en determinadas actividades

**12. GESTIÓN CLÍNICA Y DE LA CALIDAD**

-Participar en actividades de mejora de la calidad asistencial.

-Fomentar la continuidad de la atención.

-Contribuir a garantizar la seguridad del paciente

-Contribuir a los cambios organizativos.

-Conocer, y contribuir al cumplimiento de los indicadores de gestión clínica de uso más frecuente.

-Utilizar eficientemente los recursos disponibles.

**--------------------------------------------------------------------------------------------------------------------------------------**

**B) COMPETENCIAS DEL ÁREA QUIRÚRGICA (A ADQUIRIR DURANTE EL PRIMER PERÍODO DE RESIDENCIA).**

**1. ORGANIZACIÓN DEL ÁREA QUIRÚRGICA**

-Conocer la estructura, la organización, la gestión y el funcionamiento del área quirúrgica

-Conocer los principios de la Gestión Clínica en Cirugía.

-Aplicar los principios de ergonomia y del manejo del estrés

**2. SEGURIDAD DEL PACIENTE, HIGIENE Y GESTIÓN DE RIESGOS**

-Utilizar los protocolos quirúrgicos de seguridad del paciente y las listas de comprobación (*checklist*) del área quirúrgica

-Prevenir las complicaciones de los procedimientos quirúrgicos

-Aplicar los protocolos de higiene hospitalaria

-Aplicar normas de asepsia y de comportamiento quirúrgico

-Aplicar protocolos de prevención de incendios en el quirófano

-Prevenir las úlceras por presión

**3.TÉCNICAS Y PROCEDIMIENTOS EN CIRUGÍA**

-Aplicar escalas para la valoración del riesgo quirúrgico.

-Valorar y controlar los tratamientos prequirúrgicos.

-Estratificar el riesgo del tromboembolismo y realizar profilaxis.

-Conocer y participar en el manejar los estados trombofílicos y de riesgo hemorrágico

-Conocer y participar en la transfusión de hemoderivados

-Conocer la anatomía quirúrgica del área que se está tratando.

-Conocer las líneas de tensión de la piel y los mecanismos de cicatrización normal y patológica

-Conocer y emplear el instrumental y materiales quirúrgicos

-Conocer las técnicas básicas y los procesos subsidiarios de cirugía endoscópica y mínimamente invasiva y manejar el equipamiento

-Administrar la anestesia local y tratar sus efectos adversos.

-Pautar la fluidoterapia del paciente quirúrgico

-Diagnosticar y tratar la pérdida hemática y las coagulopatías asociadas

-Participar como ayudante en los procedimientos quirúrgicos (programados y urgentes)

-Realizar los diferentes tipos de suturas

-Realizar técnicas de cirugía menor

-Aplicar los diferentes tipos de drenajes quirúrgicos

-Realizar curas de heridas quirúrgicas

-Aplicar los principios del uso racional de antimicrobianos y contribuir a la prevención de las resistencias.

-Diagnosticar y tratar la infección de la herida quirúrgica y las infecciones postoperatorias.

-Tratar el dolor postoperatorio

-Conocer el aporte de fluidos en pacientes quemados

**3.1. AREAS ESPECÍFICAS.**

**Enfermo quirúrgico abdominal. Objetivo: Valorar, diagnosticar y tratar inicialmente el paciente con patología abdominal**

-Describir semiológicamente los resultados de las técnicas de imagen más habituales

-Diagnosticar y tratar inicialmente el abdomen agudo

-Diagnosticar y tratar inicialmente las hemorragias digestivas

-Diagnosticar y tratar inicialmente la patología rectal y otras alteraciones proctológicas más prevalentes.

-Diagnosticar y tratar inicialmente la patología de la pared abdominal

**Paciente quirúrgico de cabeza y cuello.**

-Describir semiológicamente los resultados de las técnicas de imagen más habituales

-Diagnosticar y tratar inicialmente las infecciones de cabeza y cuello.

-Diagnosticar y tratar inicialmente los traumatismos de cabeza y cuello.

-Diagnosticar y tratar inicialmente las masas cervicales

-Participar en las técnicas quirúrgicas para el tratamiento de la obstrucción de la vía aérea

-Mantener la vía aérea invasiva

**Paciente quirúrgico con alteraciones genitourinarias**

-Describir semiológicamente los resultados de las técnicas de imagen más habituales

-Diagnosticar y tratar inicialmente las infecciones urinarias

-Diagnosticar y tratar inicialmente la uropatía obstructiva

-Diagnosticar y tratar inicialmente el escroto agudo y las masas escrotales

-Diagnosticar y tratar inicialmente la hematuria

**Paciente quirúrgico con alteraciones de partes blandas**

-Diagnosticar y tratar inicialmente las infecciones de la piel y anejos

-Diagnosticar y tratar inicialmente las úlceras cutáneas

-Identificar las infecciones necrosantes de partes blandas

-Valorar la extensión y profundidad de las quemaduras

**Paciente quirúrgico pediátrico**

-Realizar una valoración general del riesgo quirúrgico en el paciente pediátrico

-Manejar del dolor y la ansiedad del paciente quirúrgico pediátrico

-Pautar la fluidoterapia del paciente quirúrgico pediátrico

**Paciente quirúrgico con enfermedades del tórax**

-Describir semiológicamente los resultados de las técnicas de imagen más habituales

-Participar en la realización de abordajes quirúrgicos de la cavidad torácica.

-Identificar las infecciones de mediastino

-Identificar un taponamiento cardíaco

-Diagnosticar y tratar inicialmente la patología más frecuente de la cavidad pleural

**Paciente quirúrgico con patología del aparato locomotor**

-Describir semiológicamente los resultados de las técnicas de imagen más habituales

-Diagnosticar y tratar inicialmente bursitis,tendinopatias, gangliones

-Identificar las lesiones traumáticas tendinosas.

-Diagnosticar y tratar inicialmente las infecciones del aparato locomotor, agudas y crónicas

-Diagnosticar y tratar inicialmente los procesos inflamatorios y traumáticos de huesos, articulaciones y partes blandas

-Identificar el síndrome compartimental

**Paciente quirúrgico con patología vascular**

-Describir semiológicamente los resultados de las técnicas de imagen más habituales

-Identificar la disección aórtica

-Identificar los aneurismas aórticos y periféricos

-Diagnosticar y tratar inicialmente la isquemia arterial aguda y crónica de las extremidades

-Diagnosticar y tratar inicialmente los traumatismos vasculares

-Diagnosticar y tratar inicialmente el pie diabético

-Diagnosticar y tratar inicialmente la enfermedad tromboembolica vascular

**Paciente quirúrgico con patología neurológica**

-Describir semiológicamente las técnicas de imagen más habituales.

-Identificar laceraciones de nervio periférico

-Identificar la compresión medular y radicular aguda

-Identificar la patología infecciosa del Sistema Nervioso.

-Diagnosticar y tratar inicialmente los principales síndromes compresivos nerviosos periféricos.

-Aplicar los protocolos de diagnóstico y tratamiento en el traumatismo craneoencefálico.

**Paciente con urgencia vital**

-Priorizar en caso de demandas de asistencia coincidentes (triage)

-Conocer los criterios básicos de actuación ante una catástrofe o accidente con múltiples víctimas.

-Aplicar escalas de riesgo del paciente politraumatizado

-Realizar maniobras de soporte vital inmediato

-Identificar las arritmias que comporten una urgencia vital

-Diagnosticar y tratar inicialmente la insuficiencia respiratoria aguda

-Diagnosticar y tratar inicialmente los estados de shock

-Diagnosticar y tratar inicialmente al paciente con disminución del nivel de conciencia

-Diagnosticar y tratar inicialmente al paciente politraumatizado y realizar su valoración primaria y secundaria

**Identificar los principales signos y síntomas:**

- Dolor agudo
- Dolor torácico
- Disnea
- Síncope
- Síndrome confusional agudo
- Crisis y estatus epiléptico
- Cefalea
- Diarrea
- Náuseas y vómitos
- Hemoptisis
- Masa y distensión abdominal
- Fiebre
- Ictericia
- Oliguria y anuria
- Dolor y deformidad de extremidades
- Pérdida de fuerza y parálisis.
- Alteración de la conducta
- Crisis de pánico y ansiedad
- Dolor lumbar
- Crisis Hipertensiva
- Picaduras y mordeduras
  1. **HABILIDADES Y PROCEDIMIENTOS TÉCNICOS DE URGENCIAS.**

**Ser capaz de:**

-Colocar una vía venosa periférica y una vía central

-Realizar una toracocentesis y una paracentesis evacuadoras

-Realizar una punción lumbar

-Colocar sondas nasogástricas

-Colocar sonda vesical

-Colocar un taponamiento nasal anterior

-Desbridar y drenar abscesos

-Realizar la limpieza quirúrgica y sutura de una herida traumática

-Realizar una pericardiocentesis.

-Realizar un a cistostomía percutánea

-Reducir una parafimosis

-Realizar una detorsión testicular

-Reducción de fractura de huesos propios nasales

-Reducción de luxación temporomandibular

-Evacuación de cuerpos extraños del conducto auditivo y fosa nasal

-Reducción del prolapso rectal

-Extracción de cuerpos extraños rectales

-Extracción de cuerpos extraños, anillos y arpones en otras localizaciones

-Realizar una artrocentesis

-Colocar tracción esquelética de miembro inferior

-Reducción de luxación articular

-Utilizar vendajes e inmovilizaciones en las lesiones más frecuentes de las articulaciones

-Utilizar de vendajes e inmovilizaciones en las fracturas más frecuentes

**--------------------------------------------------------------------------------------------------------------------------------------**

**C) COMPETENCIAS ESPECÍFICAS (A ADQUIRIR DURANTE LOS 3-4 ÚLTIMOS AÑOS DEL PERÍODO DE RESIDENCIA)**

**1. CUIDADO ESPECÍFICO DEL PACIENTE CARDIOVASCULAR. MANEJO PERIOPERATORIO.
Objetivos:** Adquirir las competencias necesarias para evaluar al paciente cardiovascular, identificar la prioridad y las indicaciones quirúrgicas, informar correctamente al paciente y su familia y prepararle médica y psicológicamente para la cirugía.

**-**Realizar la historia quirúrgica del paciente cardiovascular.

-Estudiar las características génicas y genéticas del paciente cardiovascular.

-Conocer la anatomía, fisiología, epidemiología y la fisiopatología de las enfermedades cardiovasculares y sus implicaciones terapéuticas.

Interpretar los métodos diagnósticos especificos y pruebas funcionales en la patología cardiovascular.

-Manejar e interpretar los métodos ecocardiográficos.

-Indicar el tratamiento médico adecuado en el paciente con patología cardiovascular durante el periodo perioperatorio y en el seguimiento.

-Indicar el tratamiento quirúrgico y establecer su prioridad en el paciente cardiovascular.

-Preparar el paciente cardiovascular clínica y psicológicamente para la cirugía.

-Registrar los pacientes intervenidos en las bases de datos hospitalaria, nacional e internacional.

1. **CUIDADOS CRÍTICOS Y MANEJO POSTOPERATORIO.**

**Objetivos:** Proporcionar las competencias necesarias para el manejo postquirúrgico en la Unidad de Cuidados Intensivos, en la planta de hospitalización y en el seguimiento. Trabajar como parte de un equipo multidisciplinario en el manejo del enfermo postquirúrgico. Manejar al paciente postoperado en situaciones normales y en aquellas que existen complicaciones o situaciones difíciles con supervisión.

-Manejar e interpretar los diferentes sistemas de monitorización del paciente postquirúrgico.

-Manejar la vía aérea y los sistemas de ventilación mecánica.

-Diagnosticar y tratar las complicaciones en el postoperatorio de la cirugía cardiovascular.

-Diagnosticar y tratar las arritmias postoperatorias.

-Tratar el sangrado postopertaorio.

-Realizar las técnicas de reintervención de emergencia.

-Diagnosticar y tratar las infecciones post-quirúrgicas en el paciente cardiovascular.

1. **CIRCULACIÓN EXTRACORPÓREA Y PROTECCIÓN MIOCÁRDICA**

**Objetivos:** Manejar con supervisión los aspectos clínicos y técnicos de la circulación extracorpórea, aplicar los diferentes métodos de protección miocárdica y los substratos metabólicos necesarios para el miocito durante la circulación extracorpórea, la isquemia miocárdica y la parada cardiocirculatoria.

-Montar y manejar los diferentes sistemas y técnicas de circulación extracorpórea

-Realizar los diferentes métodos de canulación arterial y venosa, incluyendo las vías de administración de cardioplejia.

-Manejar el inicio de la circulación extracorpórea, conducirla de forma segura y desconectar al paciente tras la cirugía.

-Diagnosticar y tratar los accidentes que puedan acontecer durante la circulación extracorpórea.

-Diagnosticar y tratar la respuesta inflamatoria sistémica de la circulación extracorpórea.

-Aplicar los diferentes métodos de protección miocárdica y sus diferentes vías de administración

-Prevenir las alteraciones metabólicas cardiacas como consecuencia de la isquemia y el daño de reperfusión

1. **ENFERMEDAD ISQUÉMICA CARDIACA.**

**Objetivos:** Adquirir progresivamente las competencias necesarias para evaluar y tratar quirúrgicamente los pacientes con cardiopatía isquémica, su prevención y seguimiento.

-Planificar el procedimiento quirúrgico (con/sin CEC) y seleccionar el injerto, en primera intervención o en pacientes con circunstancias especiales.

-Realizar los diferentes abordajes quirúrgicos para la cirugía de la cardiopatía isquémica.

-Realizar las técnicas de disección de los diferentes injertos arteriales y venosos.

-Realizar anastomosis vasculares de injertos en revascularización miocárdica.

-Realizar las técnicas de reparación de una rotura de pared libre ventricular post-IAM.

-Realizar las técnicas de reparación de una comunicación interventricular post-IAM.

-Realizar las técnicas de reparación de un aneurisma ventricular izquierdo post-IAM.

-Realizar las técnicas de reparación/sustitución valvular en insuficiencia mitral isquémica.

-Realizar e interpretar las técnicas diagnósticas intraoperatorias precisas en la cirugía coronaria.

-Diagnosticar y tratar las complicaciones quirúrgicas en la cirugía coronaria.

1. **ENFERMEDAD VALVULAR.**

**Objetivos:** Adquirir progresivamente las competencias para evaluar y tratar los aspectos quirúrgicos de los pacientes con enfermedad valvular, su prevención y seguimiento.

-Planificar técnica, procedimiento e incisión, en primera intervención o en pacientes con circunstancias especiales.

-Indicar y utilizar los diferentes materiales para el tratamiento quirúrgico de la enfermedad valvular.

-Realizar las técnicas de sustitución valvular con/sin suturas.

-Realizar las técnicas de implante de prótesis o dispositivos valvulares transcatéter.

-Realizar las técnicas de reparación valvular aórtica y pulmonar, incluyendo técnicas que implican la raiz y/o aorta ascendente.

-Realizar las técnicas de reparación valvular mitral y tricuspídea.

-Diagnosticar y tratar las complicaciones quirúrgicas en la cirugía valvular.

-Realizar e interpretar las técnicas diagnósticas intraoperatorias precisas en la cirugía valvular.

1. **CIRUGÍA DE LA AORTA TORÁCICA, TORACOABDOMINAL Y SUS RAMAS.**

**Objetivos:** Adquirir progresivamente las competencias necesarias para evaluar y tratar los aspectos quirúrgicos de los pacientes con enfermedad aorto-vascular, su prevención y seguimiento.

-Planificar el procedimiento quirúrgico (con/sin CEC), el abordaje y canulación, en primera intervención o en pacientes con circunstancias especiales.

-Seleccionar y utilizar los diferentes materiales indicados en la sustitución y reparación aórtica y de sus ramas.

-Realizar las técnicas de protección cerebral y espinal.

-Realizar las anastomosis vasculares.

-Realizar las técnicas de implante de endoprótesis vasculares y stents.

-Realizar técnicas de cirugía híbrida, con abordaje abierto y endovascular.

-Diagnosticar y tratar las complicaciones quirúrgicas en la cirugía aórtica.

-Realizar e interpretar las técnicas diagnósticas intraoperatorias precisas en la cirugía aórtica.

1. **CIRUGÍA DE LAS ARRITMIAS. ELECTROESTIMULACION CARDIACA.**

**Objetivos:** Adquirir progresivamente las competencias suficientes que le permitan evaluar y tratar quirúrgicamente a los pacientes con arritmias aisladas o asociadas a otra patología cardiovascular, incluyendo la implantación de dispositivos y sus complicaciones.

-Interpretar los métodos diagnósticos específicos de las arritmias auriculares y ventriculares.

-Manejar la farmacología, indicaciones y tratamiento médico de las arritmias.

-Realizar las técnicas de ablación de las arritmias auriculares aisladas o asociadas a otro procedimiento.

-Colaborar en las técnicas de ablación de arritmias ventriculares aisladas o asociadas a otro procedimiento.

-Planificar procedimiento, abordaje, canulación con/sin CEC, en primera intervención o en pacientes con circunstancias especiales.

-Diagnosticar y tratar las complicaciones quirúrgicas en la cirugía de las arritmias.

-Realizar e interpretar las técnicas diagnósticas intraoperatorias precisas en la cirugía de las arritmias.

-Realizar las técnicas de implante y extracción para el diagnóstico y tratamiento de las arritmias y la resincronización cardiaca.

- Realizar las técnicas de implante de marcapasos, desfibriladores. Extracción electrocatéteres y sistemas de electroestimulación cardiaca.

1. **PATOLOGÍA DEL PERICARDIO.**

**Objetivos:** Adquirir progresivamente las competencias suficientes para evaluar y tratar quirúrgicamente las enfermedades que afectan al pericardio propiamente dicho, el espacio pericárdico y las afecciones miocárdicas.

-Planificar procedimiento, abordaje, canulación, con/sin CEC, en primera intervención o en pacientes con circunstancias especiales.

-Realizar las técnicas de pericardiocentesis y el tratamiento de sus complicaciones.

-Realizar las técnicas quirúrgicas de biopsia de pericardio, ventana pericárdica y pericardiectomías.

-Diagnosticar y tratar las complicaciones quirúrgicas en la cirugía de la patología del pericardio.

**9. CIRUGÍA DE LA INSUFICIENCIA CARDIACA, ASISTENCIA VENTRICULAR Y TRASPLANTE.**

**Objetivos:** Proporcionar al cirujano cardiovascular la capacidad de evaluar y tratar a los pacientes en situación de insuficiencia cardiaca terminal, con la utilización de las técnicas quirúrgicas apropiadas, colocación de dispositivos de asistencia o trasplante.

-Conocer la epidemiología, etiología, fisiopatología y repercusión sanitaria de la insuficiencia cardiaca terminal y sus implicaciones terapéuticas.

-Realizar la evaluación clínica pre-trasplante.

-Utilizar los diferentes materiales y dispositivos en el tratamiento de los pacientes con insuficiencia cardiaca avanzada.

-Realizar las técnicas quirúrgicas alternativas a la asistencia y trasplante en los pacientes con insuficiencia cardiaca avanzada.

-Realizar las técnicas de implante de balón intra-aórtico de contrapulsación y tratar sus complicaciones

-Realizar las técnicas de implante de dispositivos para CEC con oxigenación de membrana y tratar sus complicaciones.

-Realizar las técnicas de implante de dispositivos para asistencia uni o biventricular de corta duración y tratar sus complicaciones.

-Realizar las técnicas de implante de dispositivos para asistencia uni o biventricular de larga duración o terapia de destino y tratar sus complicaciones.

-Conocer los protocolos de donación y trasplante de órganos de la Organización Nacional de Trasplantes.

-Realizar la evaluación y selección de un corazón donante, asignar su receptor adecuado y prepararlo para el trasplante.

-Realizar la extracción del corazón donante dentro de una extracción multiorgánica y las técnicas de preservación del corazón donante.

-Realizar las técnicas quirúrgicas del trasplante cardiaco ortotópico.

-Diagnosticar y tratar la disfunción de dispositivos y las complicaciones quirúrgicas en los pacientes con insuficiencia cardiaca aguda y crónica.

-Diagnosticar y tratar el rechazo del órgano.

1. **PATOLOGÍA DEL SISTEMA VASCULAR PERIFÉRICO.**

**Objetivos:** Proporcionar al cirujano cardiovascular la capacidad de evaluar y tratar a los pacientes con patología de aorta y sus ramas centrales y periféricas, utilizando los procedimientos endovasculares y quirúrgicos necesarios para su tratamiento.

-Conocer la embriología, anatomía y fisiopatología del sistema vascular periférico.

-Realizar y/o interpretar las técnicas de imagen específicas para el diagnóstico de la patología vascular.

-Diagnosticar y tratar los pacientes con isquemia arterial aguda, de forma programada y en situaciones de emergencia.

-Diagnosticar y tratar los pacientes con isquemia arterial crónica.

-Diagnosticar y tratar los síndromes compresivos arteriales más frecuentes.

-Diagnosticar y tratar la patología derivada de las complicaciones vasculares periféricas de la diabetes mellitus.

-Prevenir, diagnosticar y tratar los pacientes con enfermedad vasoespástica y vasculitis.

-Diagnosticar y tratar los pacientes con enfermedad cerebrovascular manejando las opciones quirúrgicas e intervencionistas.

-Diagnosticar y tratar los pacientes con aneurismas crónicos a nivel de aorta y sus ramas, manejando las opciones quirúrgicas e intervencionistas.

-Diagnosticar y tratar los pacientes con rotura de aneurismas en aorta y sus ramas, y arterias periféricas, manejando las opciones quirúrgicas e intervencionistas.

-Realizar las técnicas que proporcionan accesos vasculares para hemodiálisis y tratamientos crónicos, conociendo los métodos de localización y la resolución de complicaciones.

-Diagnosticar y tratar los problemas vasculares relacionados con la enfermedad renal y el trasplante renal.

-Diagnosticar y tratar la isquemia mesentérica aguda y crónica con los métodos intervencionistas y quirúrgicos necesarios.

-Diagnosticar y tratar la patología del sistema venoso periférico, incluyendo el manejo médico y quirúrgico sus recurrencias y complicaciones.

-Diagnosticar y tratar a los pacientes con trombosis venosa profunda, incluyendo el manejo médico y quirúrgico, la prevención de recurrencias y las complicaciones tromboembólicas

-Diagnosticar y tratar médica y quirúrgicamente a los pacientes con afecciones linfáticas.

-Diagnosticar y tratar a los pacientes con gangrena gaseosa y otras infecciones necrotizantes.

-Indicar y colaborar en las técnicas de reimplante de miembros.

**11. CIRUGÍA PERCUTÁNEA, MINIINVASIVA Y ROBÓTICA.**

**Objetivos:** Adquirir progresivamente la destreza suficiente para la realización de las técnicas quirúrgicas de su especialidad mediante las técnicas de miniinvasión, por vía percutánea y robótica.

-Indicar el método adecuado de cirugía según las características del paciente, así como el implante adecuado para cada tipo de abordaje por mini-invasión, percutánea y robótica.

-Planificar los recursos y equipamientos de la cirugía percutánea, miniinvasiva y robótica, y colaborar en un equipo multidisciplinario.

-Manejar el instrumental de cirugía percutánea, de miniinvasión y robótica.

-Diagnosticar y tratar las complicaciones quirúrgicas de la cirugía percutánea, miniinvasiva y robótica, incluyendo la reconversión a técnicas abiertas.

1. **CIRUGÍA DE LAS CARDIOPATÍAS CONGÉNITAS.**

**Objetivos:** Adquirir las competencias necesarias para evaluar y tratar con la supervisión adecuada, la patología de los niños y adultos con cardiopatías congénitas, incluyendo el tratamiento quirúrgico indicado, teniendo en cuenta que estas competencias constituyen el inicio de un entrenamiento más profundo en este área.

-Conocer la embriología, anatomía y fisiología de la circulación fetal, la hemodinámica normal del recién nacido y las indicaciones de la cirugía neonatal y su manejo preoperatorio.

-Conocer la fisiopatología y la semiología de las cardiopatías congénitas del neonato.

-Interpretar los métodos de imagen utilizados en el diagnóstico de las cardiopatías congénitas en el neonato.

-Realizar las técnicas invasivas en la UCI pediátrica, incluyendo accesos arteriales y venosos, drenajes pleurales y pericárdicos, técnicas de diálisis peritoneal y apertura emergente del tórax en el postoperatorio.

-Conocer las peculiaridades de la circulación extracorpórea en neonatos, lactantes y niños.

-Conocer los diferentes sistemas de monitorización anestésica en neonatos, lactantes y niños, y la farmacología para su manejo.

-Conocer las patologías cardiovasculares congénitas que existen en adolescentes y adultos y las posibles secuelas de cirugías previas.

-Interpretar los métodos de imagen utilizados en el diagnóstico de las cardiopatías congénitas en el lactante, niño y el adulto.

-Diagnosticar y tratar los defectos septales inteauriculares incluyendo el manejo del periodo perioperatorio.

-Diagnosticar y tratar los conductos arteriosos persistentes.

-Diagnosticar y colaborar en la cirugía de la coartación aórtica y la interrupción del arco aórtico.

-Diagnosticar y colaborar en la cirugía la patología valvular aórtica en la edad pediátrica.

-Diagnosticar y colaborar en la cirugía de las lesiones obstructivas del tracto salida ventrículo izquierdo.

-Diagnosticar y colaborar en la cirugía congénita de la válvula mitral.

-Diagnosticar y tratar los defectos septales interventriculares.

-Diagnosticar y tratar los drenajes venosos pulmonares anómalos.

-Diagnosticar y colaborar en la cirugía de los defectos del septo aurículoventricular y tratar las formas simples.

-Diagnosticar y colaborar en la cirugía de la situación Fallot.

-Diagnosticar y colaborar en la cirugía de la atresia pulmonar.

-Diagnosticar y colaborar en la cirugía de la trasposición de grandes arterias.

-Diagnosticar y colaborar en la cirugía de la doble salida ventrículo derecho.

-Conocer la cirugía de los anillos vasculares, y de la vía aérea.

-Conocer las indicaciones, vía de abordaje y manejo perioperatorio y colaborar en la cirugía de las fístulas sistémico-pulmonares.

-Colaborar en las técnicas de derivación cavo-pulmonar.

-Diagnosticar y en la cirugía de la hipoplasia de cavidades izquierdas.

-Diagnosticar y colaborar en la cirugía de la ventana aorto pulmonar.

-Diagnosticar y colaborar en la cirugía de las variantes del truncus arterioso.

-Diagnosticar y colaborar en la cirugía de las anomalías congénitas de las arterias coronarias.

-Conocer las indicaciones en el neonato y en el niño, las canulaciones alternativas y manejar los sistemas ECMO

-Conocer las indicaciones y las canulaciones alternativas y manejar de los sistemas de soporte mecánico uni y biventricular, temporales y definitivos.

-Conocer las técnicas de trasplante en las cardiopatías congénitas complejas.

-Tratar quirúrgicamente las arritmias auriculares y ventriculares en el paciente pediátrico y congénito adulto: técnicas abiertas e implantación de dispositivos (marcapasos, desfibriladores, resincronizadores, holter implantable)

-Tratar las complicaciones de los dispositivos antiarritmias y incluyendo los de métodos de extracción de electrodos.

-Realizar las diferentes vías de abordaje en las reintervenciones de los pacientes con cardiopatías congénitas.

-Aplicar las diferentes escalas de riesgo nacionales e internacionales de las cardiopatías congénitas, y colaborar en el registro de pacientes intervenidos en bases de datos.

1. **TRAUMATISMOS Y TUMORES CARDIOVASCULARES.
   Objetivos:** Proporcionar al especialista en formación los conocimientos y habilidades necesarias para reconocer, clasificar y tratar en el tiempo adecuado los traumatismos torácicos que afecten a las estructuras cardiocirculatorias. Adquirir las competencias para evaluar y tratar quirúrgicamente las afecciones tumorales del sistema cardiovascular.

-Conocer la historia natural, epidemiología, clínica y pronóstico de la patología tumoral cardíaca, de los grandes vasos, pericardio y sistema vascular periférico.

-Realizar las técnicas para el tratamiento quirúrgico de la patología tumoral cardiaca, de los grandes vasos, pericardio y del sistemas vascular periférico en primera intervención o en pacientes con circunstancias especiales.

-Diagnosticar y tratar traumatismos del corazón, pericardio, grandes vasos y sistema vascular periférico.

-Diagnosticar y tratar las complicaciones quirúrgicas más frecuentes en la cirugía de la patología tumoral o traumática del corazón, pericardio, grandes vasos y sistema vascular periférico.

-Realizar e interpretar las técnicas diagnósticas intraoperatorias precisas en la cirugía de la patología tumoral o traumática del corazón, pericardio, grandes vasos y vascular periférico.

**14. CIRUGÍA DE LA HIPERTENSIÓN ARTERIAL PULMONAR Y TROMBOEMBOLISMO PULMONAR AGUDO.
Objetivos**: Adquirir progresivamente las competencias para evaluar y tratar al paciente con hipertensión pulmonar y enfermedad pulmonar tromboembólica dentro de un equipo multidisciplinario.

-Conocer la fisiopatología de la hipertensión pulmonar secundaria a tromboembolismo pulmonar agudo y crónico

-Interpretar los métodos diagnósticos de la enfermedad pulmonar tromboembólica aguda y crónica.

-Indicar la cirugía del tromboembolismo pulmonar agudo.

-Indicar la cirugía de la hipertensión pulmonar tromboembólica crónica.

-Diagnosticar y tratar las complicaciones de la cirugía del tromboembolismo pulmonar y la hipertensión pulmonar.

**14. CIRUGÍA EXPERIMENTAL Y SIMULACIÓN.**

**Objetivos**: La Cirugía experimental y la Simulación quirúrgica deben formar parte del entrenamiento del cirujano cardiovascular ya que facilitan la exposición a procedimientos reales, facilitan la adquisición de habilidades técnicas y cognitivas, reducen y mejoran la curva de aprendizaje, y se pueden adaptar los modelos a las necesidades del especialista en formación.

-Conocer y utilizar los modelos animales de experimentación en cirugía cardiovascular, y aplicar los principios éticos y legales en la puesta en marcha de nuevos tratamientos.

-Manejar los instrumentos quirúrgicos.

-Realizar las técnicas de canulación arterial y venosa para circulación extracorpórea.

- Realizar las anastomosis coronarias.

- Realizar las técnicas de sustitución valvular aórtica.

-Realizar las técnicas de sustitución de la raíz aórtica.

-Realizar las técnicas de sustitución y reparación mitral y tricúspide.

-Realizar las técnicas de cirugía cardiovascular por robótica.

-Realizar las técnicas de tratamiento endovascular.

**ANEXO 6**

**ORGANIZACIÓN DE LA UNIDAD DOCENTE.**

**1. Descripción de la unidad**

La descripción de la unidad docente debe realizarse de manera clara y precisa a fin de que los médicos residentes tengan un perfecto conocimiento de la misma.

- Composición del cuadro médico y la línea jerárquica por estamentos.
- Descripción de las funciones de todos y cada uno de los miembros de la plantilla.
- Distribución del trabajo asistencial y las cargas de trabajo asumibles y asumidas.
- Nombre y descripción de las funciones del tutor de residentes.
- Descripción del plan de trabajo y las rotaciones de los residentes.
- Distribución de las guardias médicas de la unidad, tomando como referencia la recomendada por la propia sociedad científica, una de presencia física a realizar por el residente, y dos localizadas, a realizar por los médicos de plantilla en primera y segunda llamada.
- Manual de procedimientos y protocolos del servicio.

***Medios docentes***

- Sala de reuniones o sesiones clínicas.
- Habitación de residentes con soporte informático
- «Cañón» proyector y pantalla.
- Ordenador específico con reproductor de CD y de DVD.
- Fotocopiadora.

***Biblioteca***

En la propia unidad, centralizada, o bajo soporte informático con fácil acceso a las publicaciones más importantes de la especialidad, Cardiología y Medicina en general, y a la biblioteca de la universidad y/o del hospital si procede.

**2.** **Actividad asistencial**

La actividad asistencial realizada por la unidad docente tiene que seguir unas directrices ineludibles como son:

- La realización de la historia clínica según los criterios generales de la propia institución que deben ser perfectamente superponibles a los generalmente establecidos y aceptados.
- La obligatoriedad de la existencia de protocolos de diagnóstico, tratamiento y, en su caso, de investigación específicos de la unidad docente y de las áreas adscritas a la misma.
- Obligación de la aplicación de protocolos de actuación que deberán estar sometidos a actualización periódica.

**3. Sistema de garantía de calidad**

La unidad docente deberá contar con aquellos elementos de control y evaluación que permitan garantizar la adquisición de los conocimientos necesarios por los médicos residentes en su etapa de formación de esta especialidad. Para ello se evaluarán y analizarán los resultados de su actividad y progresión durante el periodo de formación, en cumplimiento de los requisitos exigidos por el Ministerio de Sanidad, Consumo y Bienestar Social y los expresados anteriormente como principios de la sociedad científica. Por otra parte, la unidad docente deberá velar para que los médicos residentes se introduzcan en la cultura de la autoevaluación y asuman ésta como una parte de su trabajo asistencial cotidiano.

Para ello, desde la unidad docente, se propiciará la participación de los residentes en el plan de calidad del servicio y en el programa de calidad del hospital en el que estén cursando su formación.

A nivel general del hospital, se potenciará su participación en las comisiones clínicas asistenciales (comisión de infecciones, terapéutica, etc.) o grupos de mejora, si los hubiera, asumiendo las responsabilidades adecuadas a su nivel de formación en la especialidad y al grado de integración en el hospital. Recomendable a partir del tercer año de residencia.

Deberán participar también desde el primer año, con un creciente grado de integración y responsabilidad, en las actividades de evaluación del propio servicio, ya sea a través de las sesiones de mortalidad, morbilidad, seguimiento de indicadores, etc.

Participarán de forma activa en las sesiones de presentación y discusión de casos.

De forma independiente, la unidad docente deberá evaluar la calidad de su propia gestión docente, considerando a los médicos residentes como sus clientes a quienes debe dar una serie de servicios a fin de que concluyan su etapa de formación con éxito y alcanzando los objetivos propuestos en este mismo documento.

**4.** **Programa docente de la especialidad**

Con respecto al programa docente, la unidad docente tiene que cumplir los requisitos siguientes:

- Preparación de un programa docente específico de la unidad que siga el programa elaborado por la Comisión Nacional de la Especialidad y refrendado por el Ministerio de Sanidad, Consumo y Bienestar Social.
- Especificación de la actividad asistencial, docente e investigadora a realizar por los residentes.
- Abordaje de todas las áreas de competencia reconocidas en el programa de formación.
- Notificación sobre el seguimiento del programa docente y cumplimiento de las evaluaciones correspondientes.
- Cuantificación de la actividad asistencial, docente e investigadora realizada por los residentes.
- Memoria anual con las evaluaciones sobre el seguimiento de la docencia.

**5.** **Control del cumplimiento del programa docente**

Para realizar un correcto seguimiento de cómo se cumple el programa docente establecido es necesario, en primer lugar, establecer unas normas para saber en todo momento qu**é** es lo que hay que hacer y de qué forma llevarlo a cabo. Se le exigirá, tanto a la unidad docente como a la Comisión de Docencia del hospital el correcto cumplimiento con los criterios marcados por el Ministerio de Sanidad Consumo y Bienestar Social en cuanto al seguimiento y evaluación de los residentes (Resolución de 21 de marzo de 2018 publicada en el BOE con fecha 19 de abril de 2018 55).

**6. Memoria anual de actividad de la unidad docente**

Debe redactarse haciendo constar la actividad asistencial, docente e investigadora realizadas. Asimismo, debe constatarse, de manera precisa, la producción científica de la unidad.

**7.** **Actividad docente e investigadora de la unidad docente**

***Actividad docente***

La actividad docente llevada a cabo por la unidad debe también superar una serie de requerimientos mínimos que además serán de obligado cumplimiento.

Deberán realizarse varios cursos (más de dos) de formación continuada anualmente tanto para el personal médico, ya sea de plantilla o residentes, como para el resto de personal sanitario.

Sesiones clínicas:

- Sesión medico-quirúrgica por lo menos semanal.
- Sesión de morbimortalidad por lo menos mensual.
- Sesión monográfica (seminario) por lo menos mensual.
- Sesión bibliográfica por lo menos mensual.

***Actividad científica e investigadora***

La unidad docente deberá tener una producción científica suficiente, y para ello tendrá que justificar un mínimo de tres publicaciones anuales en revistas de la especialidad indexadas, ya sean españolas o extranjeras. En el caso de que no se llegue a este número, podrá aceptarse que sólo sean dos publicaciones, y por lo menos tres comunicaciones en congresos nacionales o internacionales de la especialidad.

Todas las unidades docentes que soliciten su acreditación para impartir docencia posgraduada deberán haber cumplido este requisito en los 2 años anteriores a la petición, y a su vez, las unidades ya acreditadas que no alcancen el nivel mínimo de producción científica, durante más de 2 años consecutivos, perderán la acreditación docente.

**8.** **Requisitos a cumplir por el hospital de la unidad docente**

El hospital en el que se enmarca la unidad docente debe también cumplir una serie de requisitos mínimos.

***Servicios y especialidades médicas***

Naturalmente, el hospital que acoge la unidad docente que quiere ser acreditada será de los llamados de tercer nivel, es decir, dispondrá de todas las especialidades médicas. Sin embargo, se le va a exigir un funcionamiento riguroso de una serie de servicios que se consideran fundamentales:

- Servicio de hematología y banco de sangre.
- Servicio de radiodiagnóstico con tomografía computarizada y resonancia magnética con experiencia en imagen cardiovascular.
- Servicio de bioquímica.
- Servicio de inmunología.
- Servicio de microbiología.
- Servicio de anatomía patológica.
- Servicio de medicina interna.
- Servicio de urgencias.
- Servicio de anestesiología, reanimación y terapéutica del dolor.
- Servicio de cardiología que cuente con unidad coronaria, gabinetes de exploraciones no invasivas y registros gráficos y hemodinámica diagnóstica y terapéutica.
- Servicio de cuidados intensivos generales con una unidad destinada al postoperatorio de cirugía cardíaca de un mínimo de seis camas.
- Servicio de neurología.
- Servicio de nefrología.
- Servicio de neumología.
- Unidad de cirugía experimental y simulación quirúrgica en el área cardiovascular.

***Documentación necesaria para la acreditación de la unidad docente***

La unidad docente y la dirección del centro hospitalario que alberga dicha unidad, deberán remitir por escrito a la Comisión Nacional de Cirugía Cardiovascular como requisito para la acreditación o reacreditación docente, una información detallada relativa a la organización, jerarquización, responsabilidades, protocolos y el compromiso documental firmado de todos los responsables de cada estamento implicado. Se adjuntará, además, la fotocopia compulsada del título de Especialista en Cirugía Cardiovascular en España, de todos y cada uno de los médicos de la plantilla.

La acreditación de cada unidad docente será reevaluada *in extenso* cada 4 años.

La reacreditación de la unidad docente será obligatoria cada vez que cambien los responsables docentes que estaban comprometidos con la acreditación previa.

La unidad docente asumirá por escrito la obligatoriedad de prolongar una determinada fase del ciclo formativo del programa docente, siempre que, por enfermedad, embarazo o cualquier causa mayor, debidamente justificada, éste se haya interrumpido más de 6 meses.

El responsable de la unidad docente comunicará por escrito a la Comisión Nacional de la Especialidad el cumplimiento de los requisitos mínimos exigidos al acreditar dicha unidad y el seguimiento correcto del programa docente antes del 31 de marzo de cada año.
